# Supplementary material
Source: HighWire-hosted journal article supplement (https://bjsm.bmj.com/content/58/8/427)
Supplement: inline-supplementary-material-2 [file inline-supplementary-material-2.pdf]

## Accelerometer-derived physical activity and the risk of mortality, heart failure, and stroke in patients with atrial fibrillation: A prospective study from UK Biobank

### Supplementary materials

**Supplementary Table 1.** Definitions of covariates and outcomes.

**Supplementary Table 2.** Comparison of the baseline characteristics between excluded and included patients of our study.

**Supplementary Table 3.** Baseline characteristics of the study population according to the adherence to physical activity extended guidelines based on the objectively measured moderate to vigorous physical activity using a wrist-worn accelerometer.

**Supplementary Table 4.** The risk of primary and secondary outcomes according to the adherence to the physical activity guidelines.

**Supplementary Table 5.** The risk of primary and secondary outcomes according to the adherence to the physical activity standard guideline determined by the objectively measured moderate to vigorous physical activity using a wrist-worn accelerometer, by excluding clinical outcomes during the first 90 days of follow-up.

**Supplementary Table 6.** Adherence to the physical activity standard guideline and the risk of all-cause mortality, cardiovascular mortality, heart failure, and ischemic stroke according to several subgroups.

**Supplementary Figure 1.** Cumulative risks of A) all-cause mortality, B) cardiovascular mortality, C) heart failure, and D) stroke, stratified by adherence to physical activity extended guideline based on the objectively measured moderate to vigorous physical activity using a wrist-worn accelerometer.

**Supplementary Figure 2.** The risk of all-cause mortality and heart failure according to the objectively measured moderate to vigorous physical activity using a wrist-worn accelerometer applying the cutoff of 125mg and 150mg; A) all-cause mortality (MVPA cutoff, 125 mg); B) all-cause mortality (MVPA cutoff, 150 mg); C) heart failure (MVPA cutoff, 125 mg), and; D) heart failure (MVPA cutoff, 150 mg).

**Supplementary Figure 3.** Cumulative risks of all-cause mortality and heart failure stratified by adherence to physical activity standard guidelines based on the objectively measured moderate to vigorous physical activity using a wrist-worn accelerometer applying the cutoff of 125mg and 150mg; A) all-cause mortality (MVPA cutoff, 125 mg); B) all-cause mortality (MVPA cutoff, 150 mg); C) heart failure (MVPA cutoff, 125 mg), and; D) heart failure (MVPA cutoff, 150 mg).

**Supplementary Table 1.** Definitions of covariates and outcomes.

| <b>Diagnosis</b>                                      | <b>UK Biobank Field ID</b>                                                                                          | <b>Diagnostic code (ICD-9 or ICD-10)</b> |
|-------------------------------------------------------|---------------------------------------------------------------------------------------------------------------------|------------------------------------------|
| <b>Inclusion</b>                                      |                                                                                                                     |                                          |
| Atrial fibrillation                                   | 41270, 41280, 131350                                                                                                | I48                                      |
| <b>Primary outcome</b>                                |                                                                                                                     |                                          |
| All-cause mortality                                   | 40000                                                                                                               |                                          |
| <b>Secondary outcome</b>                              |                                                                                                                     |                                          |
| Cardiovascular mortality                              | 40001                                                                                                               | I code                                   |
| Heart failure                                         | 41270, 41280, 131354                                                                                                | I50, I11.0, I13.0, I13.2                 |
| Stroke                                                | 20002, 20008, 20004, 20010, 41270, 41280, 131360, 131362, 131364, 131366, 131368, 41271, 41281, 41272, 41282, 42006 | I60-I64                                  |
| <b>Covariates</b>                                     |                                                                                                                     |                                          |
| Age                                                   | 21022                                                                                                               |                                          |
| Sex                                                   | 31                                                                                                                  |                                          |
| Body mass index                                       | 21001                                                                                                               |                                          |
| Current smoking                                       | 20116                                                                                                               |                                          |
| Alcohol intake                                        | 1558                                                                                                                |                                          |
| Diabetes mellitus                                     | 2443, 6153, 6177, 20002, 130708, 130710, 130712, 130714                                                             |                                          |
|                                                       | 41270, 41280                                                                                                        | E11-E14                                  |
| Hypertension                                          | 6153, 6177, 20002, 2966, 131286, 131288, 131290, 131292, 131294                                                     |                                          |
|                                                       | 41270, 41280                                                                                                        | I10-I13, I15                             |
| Dyslipidemia                                          | 6153, 6177, 20002, 130814                                                                                           |                                          |
|                                                       | 41270, 41280                                                                                                        | E78                                      |
| Myocardial infarction                                 | 41270, 41280                                                                                                        | I21-I22, I25                             |
| Townsend Deprivation Index                            | 189                                                                                                                 |                                          |
| <b>Charlson Comorbidity Index</b>                     |                                                                                                                     |                                          |
| Myocardial infarction                                 | 41270, 41280                                                                                                        | I21-I22, I25                             |
| Congestive heart failure                              | 41270, 41281                                                                                                        | I50                                      |
| Peripheral vascular disease                           | 41270, 41282                                                                                                        | I70-I79                                  |
| Cerebrovascular accident or transient ischemic attack | 41270, 41283                                                                                                        | I60-I69                                  |
| Dementia                                              | 41270, 41284                                                                                                        | F03, G30                                 |
| Chronic obstructive pulmonary disease                 | 41270, 41285                                                                                                        | J41-J45, J47, J64                        |
| Connective tissue disease                             | 41270, 41286                                                                                                        | M30-M36, M06                             |
| Peptic ulcer disease                                  | 41270, 41287                                                                                                        | K25, K26                                 |
| Liver disease                                         | 41270, 41288                                                                                                        | B18, B19, K70-K77                        |

---

|                                                        |              |                           |
|--------------------------------------------------------|--------------|---------------------------|
| Hemiplegia                                             | 41270, 41289 | G80-G82                   |
| Moderate to severe chronic kidney disease              | 41270, 41290 | N17-N19                   |
| Malignancy (localized solid tumor, leukemia, lymphoma) | 41270, 41291 | C00-C99 (except C44, C73) |
| Metastatic malignancy                                  | 41270, 41292 | C76-C80                   |
| AIDS                                                   | 41270, 41293 | B20-B24                   |

---

Abbreviations: ICD, International Classification of Diseases.

**Supplementary Table 2.** Comparison of the baseline characteristics between excluded and included patients of our study.

|                                           | Patients with AF                  |                                  | p-value |
|-------------------------------------------|-----------------------------------|----------------------------------|---------|
|                                           | Excluded <sup>a</sup><br>N=34,988 | Included <sup>b</sup><br>N=3,002 |         |
| <b>Age</b>                                | 67.2 ± 6.1                        | 67.1 ± 6.1                       | 0.74    |
| <b>Sex</b>                                |                                   |                                  | <0.001  |
| Female                                    | 12,985 (37.1%)                    | 978 (32.6%)                      |         |
| Male                                      | 22,003 (62.9%)                    | 2,024 (67.4%)                    |         |
| <b>Body mass index (kg/m<sup>2</sup>)</b> | 29.1 ± 5.4                        | 28.1 ± 5.0                       | <0.001  |
| <b>Comorbidities</b>                      |                                   |                                  |         |
| Hypertension                              | 18,885 (54.0%)                    | 1,953 (65.1%)                    | <0.001  |
| Diabetes mellitus                         | 4,040 (11.5%)                     | 317 (10.6%)                      | 0.10    |
| Dyslipidemia                              | 13,727 (39.2%)                    | 1,521 (50.7%)                    | <0.001  |
| Myocardial infarction                     | 3,098 (8.9%)                      | 245 (8.2%)                       | 0.20    |
| <b>CHA<sub>2</sub>DS<sub>2</sub>-VASc</b> | 2.2 ± 1.2                         | 2.4 ± 1.3                        | <0.001  |
| <b>Medications</b>                        |                                   |                                  |         |
| Hypertensive medication                   | 15,147 (43.3%)                    | 1,220 (40.6%)                    | 0.005   |
| Dyslipidemia medication                   | 12,684 (36.3%)                    | 1,065 (35.5%)                    | 0.40    |
| Warfarin                                  | 3,140 (9.0%)                      | 502 (16.7%)                      | <0.001  |
| Antiplatelet                              | 11,301 (32.3%)                    | 1,122 (37.4%)                    | <0.001  |
| <b>Charlson Comorbidity Index</b>         | 3.0 ± 1.5                         | 3.5 ± 1.9                        | <0.001  |
| <b>Townsend deprivation index</b>         | -1.1 ± 3.2                        | -1.8 ± 2.8                       | <0.001  |
| <b>Lifestyle behaviors</b>                |                                   |                                  |         |
| Current smoking                           | 3,751 (10.7%)                     | 173 (5.8%)                       | <0.001  |
| Daily drinking                            | 8,293 (23.7%)                     | 862 (28.7%)                      | <0.001  |
| <b>Laboratory values</b>                  |                                   |                                  |         |
| Systolic blood pressure (mmHg)            | 144.9 ± 20.5                      | 141.9 ± 19.8                     | <0.001  |
| Diastolic blood pressure (mmHg)           | 82.8 ± 11.2                       | 82.6 ± 11.3                      | 0.45    |
| Cholesterol (mmol/L)                      | 5.4 ± 1.2                         | 5.3 ± 1.2                        | 0.099   |
| HDL(mmol/L)                               | 1.4 ± 0.4                         | 1.4 ± 0.4                        | 0.26    |
| LDL (mmol/L)                              | 3.3 ± 0.9                         | 3.3 ± 0.9                        | 0.23    |
| TG (mmol/L)                               | 1.8 ± 1.0                         | 1.7 ± 1.0                        | <0.001  |
| Glucose (mmol/L)                          | 5.4 ± 1.6                         | 5.2 ± 1.2                        | <0.001  |
| HbA1c (mmol/mol)                          | 38.1 ± 8.5                        | 36.8 ± 6.7                       | <0.001  |

Abbreviation: HDL-C, high-density lipoprotein cholesterol; LDL-C, low-density lipoprotein cholesterol; TG, triglyceride.

<sup>a</sup>: Patients with AF who do not have accelerometer data or have accelerometer data before their AF diagnosis.

<sup>b</sup>: Patients with AF who have accelerometer data (after their AF diagnosis).

**Supplementary Table 3.** Baseline characteristics of the study population according to the adherence to physical activity extended guidelines based on the objectively measured moderate to vigorous physical activity using a wrist-worn accelerometer.

|                                                   | Total<br>N=2,324 | Not meeting PA<br>extended*<br>guideline<br>N=1,909 (82.1%) | Meeting PA<br>extended*<br>guideline<br>N=415 (17.9%) | p-<br>value |
|---------------------------------------------------|------------------|-------------------------------------------------------------|-------------------------------------------------------|-------------|
| <b>Age</b>                                        | 66.9 ± 6.2       | 67.4 ± 6.0                                                  | 65.0 ± 6.5                                            | <0.001      |
| <b>Sex</b>                                        |                  |                                                             |                                                       | <0.001      |
| Female                                            | 816 (35.1%)      | 712 (37.3%)                                                 | 104 (25.1%)                                           |             |
| Male                                              | 1,508 (64.9%)    | 1,197 (62.7%)                                               | 311 (74.9%)                                           |             |
| <b>Race</b>                                       |                  |                                                             |                                                       |             |
| White                                             | 2287 (98.5%)     | 1878 (98.4%)                                                | 409 (98.6%)                                           | 0.861       |
| <b>Body mass index</b>                            | 27.9 ± 4.9       | 28.3 ± 5.1                                                  | 26.0 ± 3.7                                            | <0.001      |
| <b>Comorbidities</b>                              |                  |                                                             |                                                       |             |
| Hypertension                                      | 1,438 (61.9%)    | 1,224 (64.1%)                                               | 214 (51.6%)                                           | <0.001      |
| Diabetes mellitus                                 | 203 (8.7%)       | 184 (9.6%)                                                  | 19 (4.6%)                                             | <0.001      |
| Dyslipidemia                                      | 1,101 (47.4%)    | 945 (49.5%)                                                 | 156 (37.6%)                                           | <0.001      |
| Myocardial infarction                             | 144 (6.2%)       | 128 (6.7%)                                                  | 16 (3.9%)                                             | 0.029       |
| <b>Medications</b>                                |                  |                                                             |                                                       |             |
| Hypertensive medication                           | 877 (37.7%)      | 761 (39.9%)                                                 | 116 (28.0%)                                           | <0.001      |
| Dyslipidemia medication                           | 743 (32.0%)      | 647 (33.9%)                                                 | 96 (23.1%)                                            | <0.001      |
| Warfarin                                          | 308 (13.3%)      | 263 (13.8%)                                                 | 45 (10.8%)                                            | 0.11        |
| Antiplatelet                                      | 833 (35.8%)      | 702 (36.8%)                                                 | 131 (31.6%)                                           | 0.045       |
| <b>CHA<sub>2</sub>DS<sub>2</sub>-VASc</b>         | 2.2 ± 1.1        | 2.2 ± 1.1                                                   | 2.0 ± 1.1                                             | <0.001      |
| <b>Charlson Comorbidity Index</b>                 | 3.2 ± 1.7        | 3.3 ± 1.7                                                   | 2.8 ± 1.6                                             | <0.001      |
| <b>Townsend Deprivation Index</b>                 | -1.9 ± 2.7       | -1.9 ± 2.7                                                  | -1.7 ± 2.8                                            | 0.084       |
| <b>Lifestyle behaviors</b>                        |                  |                                                             |                                                       |             |
| Current smoking                                   | 130 (5.6%)       | 107 (5.6%)                                                  | 23 (5.5%)                                             | 0.96        |
| Daily drinking                                    | 669 (28.8%)      | 538 (28.2%)                                                 | 131 (31.6%)                                           | 0.17        |
| <b>Laboratory data</b>                            |                  |                                                             |                                                       |             |
| Systolic blood pressure (mmHg)                    | 142.1 ± 19.4     | 142.6 ± 19.3                                                | 140.2 ± 19.9                                          | 0.026       |
| Diastolic blood pressure (mmHg)                   | 82.6 ± 11.0      | 82.6 ± 11.0                                                 | 82.1 ± 11.4                                           | 0.41        |
| Cholesterol (mmol/L)                              | 5.4 ± 1.1        | 5.4 ± 1.2                                                   | 5.5 ± 1.0                                             | 0.10        |
| HDL(mmol/L)                                       | 1.4 ± 0.4        | 1.4 ± 0.4                                                   | 1.4 ± 0.3                                             | 0.003       |
| LDL (mmol/L)                                      | 3.3 ± 0.9        | 3.3 ± 0.9                                                   | 3.4 ± 0.8                                             | 0.15        |
| TG (mmol/L)                                       | 1.7 ± 0.9        | 1.7 ± 0.9                                                   | 1.6 ± 0.9                                             | 0.003       |
| Glucose (mmol/L)                                  | 5.1 ± 1.0        | 5.1 ± 1.1                                                   | 5.0 ± 0.8                                             | 0.050       |
| HbA1c (mmol/mol)                                  | 36.4 ± 6.2       | 36.7 ± 6.5                                                  | 35.5 ± 4.6                                            | <0.001      |
| <b>Overall acceleration<br/>(miligravity, mg)</b> | 24.9 ± 7.4       | 23.2 ± 5.7                                                  | 33.0 ± 8.6                                            | <0.001      |

---

|                                 |                       |                      |                        |        |
|---------------------------------|-----------------------|----------------------|------------------------|--------|
| <b>MVPA duration (min/week)</b> | 105.8<br>(37.4-229.4) | 80.0<br>(26.7-151.3) | 420.1<br>(352.5-550.1) | <0.001 |
|---------------------------------|-----------------------|----------------------|------------------------|--------|

---

Abbreviation: PA, physical activity; HDL-C, high-density lipoprotein cholesterol; LDL-C, Low-density lipoprotein cholesterol; TG, triglyceride; MVPA, moderate to vigorous physical activity.

\*: ESC/AHA/WHO extended recommendation, MVPA  $\geq$  300 min/week

**Supplementary Table 4.** The risk of primary and secondary outcomes according to the adherence to the physical activity guidelines.

| Outcomes and MVPA duration      | Event / N | Cumulative incidence | HR (95% CI)         |         |                     |         |                     |         |
|---------------------------------|-----------|----------------------|---------------------|---------|---------------------|---------|---------------------|---------|
|                                 |           |                      | Model 1             |         | Model 2             |         | Model 3             |         |
| <b>All-cause mortality</b>      |           |                      |                     |         |                     |         |                     |         |
| MVPA < 150 min/wk               | 134/1430  | 13.4%                | 1 (Reference)       |         | 1 (Reference)       |         | 1 (Reference)       |         |
| 150 min/wk ≤ MVPA < 300 min/wk  | 29/481    | 6.4%                 | 0.639 (0.428-0.955) | p=0.029 | 0.673 (0.449-1.009) | p=0.055 | 0.759 (0.504-1.142) | p=0.186 |
| 300 min/wk ≤ MVPA               | 18/413    | 6.8%                 | 0.459 (0.280-0.750) | p=0.002 | 0.503 (0.306-0.828) | p=0.007 | 0.539 (0.325-0.895) | p=0.017 |
|                                 |           |                      | p-for-trend <0.001  |         | p-for-trend <0.001  |         | p-for-trend <0.001  |         |
| <b>Cardiovascular mortality</b> |           |                      |                     |         |                     |         |                     |         |
| MVPA < 150 min/wk               | 43/1430   | 5.13%                | 1 (Reference)       |         | 1 (Reference)       |         | 1 (Reference)       |         |
| 150 min/wk ≤ MVPA < 300 min/wk  | 11/481    | 2.3%                 | 0.755 (0.389-1.464) | p=0.405 | 0.805 (0.413-1.572) | p=0.526 | 0.918 (0.467-1.805) | p=0.805 |
| 300 min/wk ≤ MVPA               | 8/413     | 3.8%                 | 0.636 (0.299-1.353) | p=0.240 | 0.708 (0.329-1.524) | p=0.377 | 0.755 (0.345-1.651) | p=0.481 |
|                                 |           |                      | p-for-trend =0.390  |         | p-for-trend =0.056  |         | p-for-trend <0.001  |         |
| <b>Heart failure</b>            |           |                      |                     |         |                     |         |                     |         |
| MVPA < 150 min/wk               | 171/1430  | 15.9%                | 1 (Reference)       |         | 1 (Reference)       |         | 1 (Reference)       |         |
| 150 min/wk ≤ MVPA < 300 min/wk  | 27/481    | 7.7%                 | 0.451 (0.300-0.677) | p<0.001 | 0.495 (0.329-0.745) | p=0.001 | 0.601 (0.398-0.907) | p=0.015 |
| 300 min/wk ≤ MVPA               | 27/413    | 7.3%                 | 0.521(0.347-0.782)  | p=0.002 | 0.609 (0.403-0.920) | p=0.018 | 0.782 (0.513-1.192) | p=0.252 |
|                                 |           |                      | p-for-trend <0.001  |         | p-for-trend <0.001  |         | p-for-trend <0.001  |         |
| <b>Stroke</b>                   |           |                      |                     |         |                     |         |                     |         |
| MVPA < 150 min/wk               | 61/1430   | 4.9%                 | 1 (Reference)       |         | 1 (Reference)       |         | 1 (Reference)       |         |
| 150 min/wk ≤ MVPA < 300 min/wk  | 15/481    | 4.1%                 | 0.721 (0.410-1.268) | p=0.256 | 0.787 (0.445-1.393) | p=0.411 | 0.812 (0.456-1.447) | p=0.481 |
| 300 min/wk ≤ MVPA               | 15/413    | 3.7%                 | 0.835 (0.475-1.469) | p=0.532 | 0.958 (0.538-1.706) | p=0.884 | 0.905 (0.501-1.634) | p=0.740 |
|                                 |           |                      | p-for-trend =0.467  |         | p-for-trend =0.039  |         | p-for-trend =0.002  |         |

Abbreviation: PA, physical activity; HR, hazard ratio; CI, confidence interval.

Model 1: unadjusted

Model 2: adjusted by age and sex

Model 3: adjusted by age, sex, body mass index, current smoking, daily drinking, Charlson Comorbidity Index, and Townsend Deprivation Index.



**Supplementary Table 5.** The risk of primary and secondary outcomes according to the adherence to the physical activity standard guideline determined by the objectively measured moderate to vigorous physical activity using a wrist-worn accelerometer, by excluding clinical outcomes during the first 90 days of follow-up.

| Outcomes and adherence to PA standard guideline | Event / N | Cumulative incidence | HR (95% CI)                    |                                |                                |
|-------------------------------------------------|-----------|----------------------|--------------------------------|--------------------------------|--------------------------------|
|                                                 |           |                      | Model 1                        | Model 2                        | Model 3                        |
| <b>All-cause mortality</b>                      |           |                      |                                |                                |                                |
| Not meeting                                     | 132/1430  | 13.0%                | 1 (Reference)                  | 1 (Reference)                  | 1 (Reference)                  |
| Meeting                                         | 49/481    | 6.8%                 | 0.583 (0.419-0.812)<br>p=0.001 | 0.630 (0.449-0.882)<br>p=0.007 | 0.698 (0.495-0.986)<br>p=0.041 |
| <b>Cardiovascular mortality</b>                 |           |                      |                                |                                |                                |
| Not meeting                                     | 42/1430   | 4.9%                 | 1 (Reference)                  | 1 (Reference)                  | 1 (Reference)                  |
| Meeting                                         | 20/481    | 3.1%                 | 0.732 (0.425-1.261)<br>p=0.261 | 0.820 (0.470-1.430)<br>p=0.484 | 0.918 (0.520-1.621)<br>p=0.768 |
| <b>Heart failure</b>                            |           |                      |                                |                                |                                |
| Not meeting                                     | 171/1430  | 15.8%                | 1 (Reference)                  | 1 (Reference)                  | 1 (Reference)                  |
| Meeting                                         | 54/481    | 7.2%                 | 0.460 (0.337-0.630)<br>p<0.001 | 0.527 (0.383-0.725)<br>p<0.001 | 0.656 (0.473-0.908)<br>p=0.011 |
| <b>Stroke</b>                                   |           |                      |                                |                                |                                |
| Not meeting                                     | 59/1430   | 4.5%                 | 1 (Reference)                  | 1 (Reference)                  | 1 (Reference)                  |
| Meeting                                         | 32/481    | 4.3%                 | 0.896 (0.580-1.384)<br>p=0.621 | 1.017 (0.652-1.589)<br>p=0.939 | 1.013 (0.641-1.602)<br>p=0.955 |

Abbreviation: PA, physical activity; HR, hazard ratio; CI, confidence interval

**Supplementary Table 6.** Adherence to the physical activity standard guideline and the risk of all-cause mortality, cardiovascular mortality, heart failure, and ischemic stroke according to several subgroups.

| Subgroup    | All-cause mortality      |         |                   | Cardiovascular mortality |         |                   | Heart failure            |         |                   | Stroke                   |         |                   |
|-------------|--------------------------|---------|-------------------|--------------------------|---------|-------------------|--------------------------|---------|-------------------|--------------------------|---------|-------------------|
|             | HR (95% CI) <sup>a</sup> | P value | P-for-interaction | HR (95% CI) <sup>a</sup> | P value | P-for-interaction | HR (95% CI) <sup>a</sup> | P value | P-for-interaction | HR (95% CI) <sup>a</sup> | P value | P-for-interaction |
| <b>Age</b>  |                          |         |                   |                          |         |                   |                          |         |                   |                          |         |                   |
| <65         | 0.271 (0.121-0.610)      | 0.002   | 0.018             | 0.430 (0.125-1.475)      | 0.180   | 0.275             | 0.528 (0.257-1.088)      | 0.083   | 0.911             | 0.699 (0.282-1.733)      | 0.440   | 0.616             |
| ≥65         | 0.847 (0.584-1.228)      | 0.487   |                   | 1.021 (0.552-1.887)      | 0.948   |                   | 0.673 (0.473-0.956)      | 0.027   |                   | 1.001 (0.597-1.678)      | 0.997   |                   |
| <b>Sex</b>  |                          |         |                   |                          |         |                   |                          |         |                   |                          |         |                   |
| Male        | 0.785 (0.539-1.143)      | 0.206   | 0.465             | 1.307 (0.698-2.449)      | 0.403   | 0.214             | 0.615 (0.428-0.883)      | 0.008   | 0.587             | 0.591 (0.211-1.654)      | 0.316   | 0.224             |
| Female      | 0.568 (0.230-1.403)      | 0.220   |                   | 0.349 (0.075-1.617)      | 0.178   |                   | 0.854 (0.434-1.679)      | 0.647   |                   | 1.164 (0.688-1.967)      | 0.572   |                   |
| <b>CCI</b>  |                          |         |                   |                          |         |                   |                          |         |                   |                          |         |                   |
| <3          | 0.568 (0.268-1.205)      | 0.140   | 0.327             | 1.047 (0.366-2.995)      | 0.932   | 0.559             | 0.879 (0.415-1.862)      | 0.736   | 0.221             | 1.411 (0.558-3.567)      | 0.466   | 0.400             |
| ≥3          | 0.748 (0.511-1.094)      | 0.134   |                   | 0.841 (0.428-1.656)      | 0.617   |                   | 0.653 (0.456-0.934)      | 0.020   |                   | 0.830 (0.485-1.419)      | 0.496   |                   |
| <b>CVAS</b> |                          |         |                   |                          |         |                   |                          |         |                   |                          |         |                   |
| <2          | 0.529 (0.193-1.444)      | 0.214   | 0.386             | 0.634 (0.169-2.385)      | 0.500   | 0.659             | 0.844 (0.335-2.128)      | 0.719   | 0.190             | 0.616 (0.197-1.928)      | 0.406   | 0.185             |
| ≥2          | 0.741 (0.516-1.065)      | 0.106   |                   | 1.006 (0.543-1.864)      | 0.984   |                   | 0.644 (0.457-0.908)      | 0.012   |                   | 1.087 (0.661-1.786)      | 0.742   |                   |

Abbreviation: PA, physical activity; HR, hazard ratio; CI, confidence interval.

a) adjusted by age, sex, body mass index, current smoking, daily drinking, Charlson Comorbidity Index, and Townsend Deprivation Index.

**Supplementary Figure 1.** Cumulative risks of A) all-cause mortality, B) cardiovascular mortality, C) heart failure, and D) stroke, stratified by adherence to physical activity extended guidelines based on the objectively measured moderate to vigorous physical activity using a wrist-worn accelerometer.

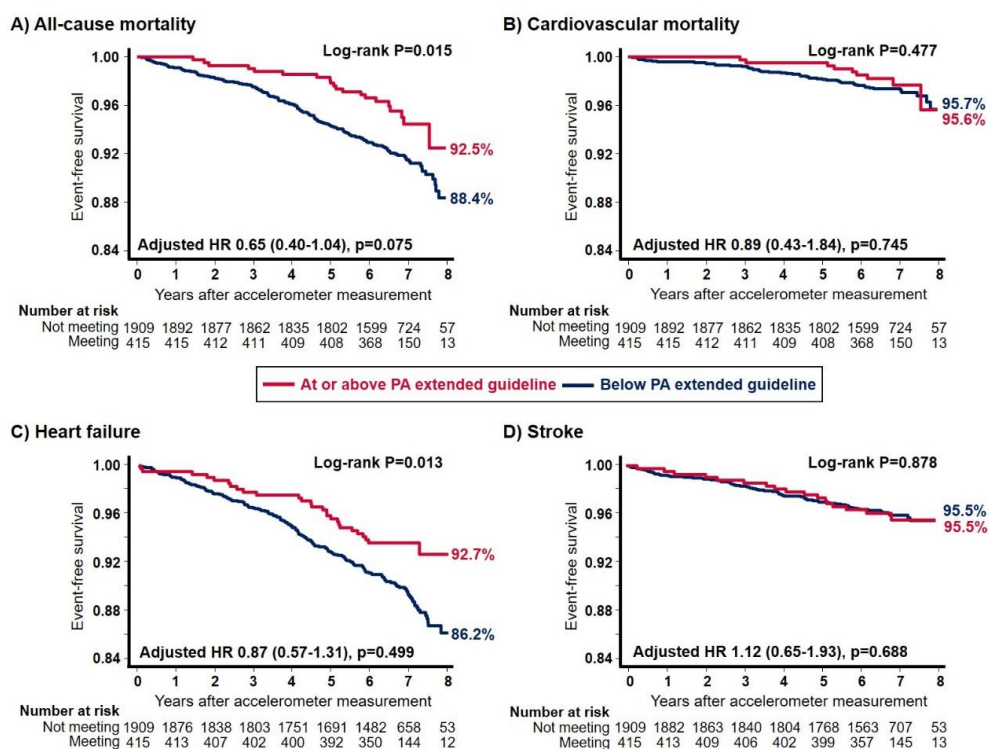

Abbreviation: HR, hazard ratio; PA, physical activity.

Hazard ratios were adjusted by age, sex, body mass index, current smoking, daily drinking, Charlson Comorbidity Index, and Townsend Deprivation Index.

**Supplementary Figure 2.** The risk of all-cause mortality and heart failure according to the objectively measured moderate to vigorous physical activity using a wrist-worn accelerometer applying the cutoff of 125mg and 150mg; A) all-cause mortality (MVPA cutoff, 125 mg); B) all-cause mortality (MVPA cutoff, 150 mg); C) heart failure (MVPA cutoff, 125 mg), and; D) heart failure (MVPA cutoff, 150 mg).

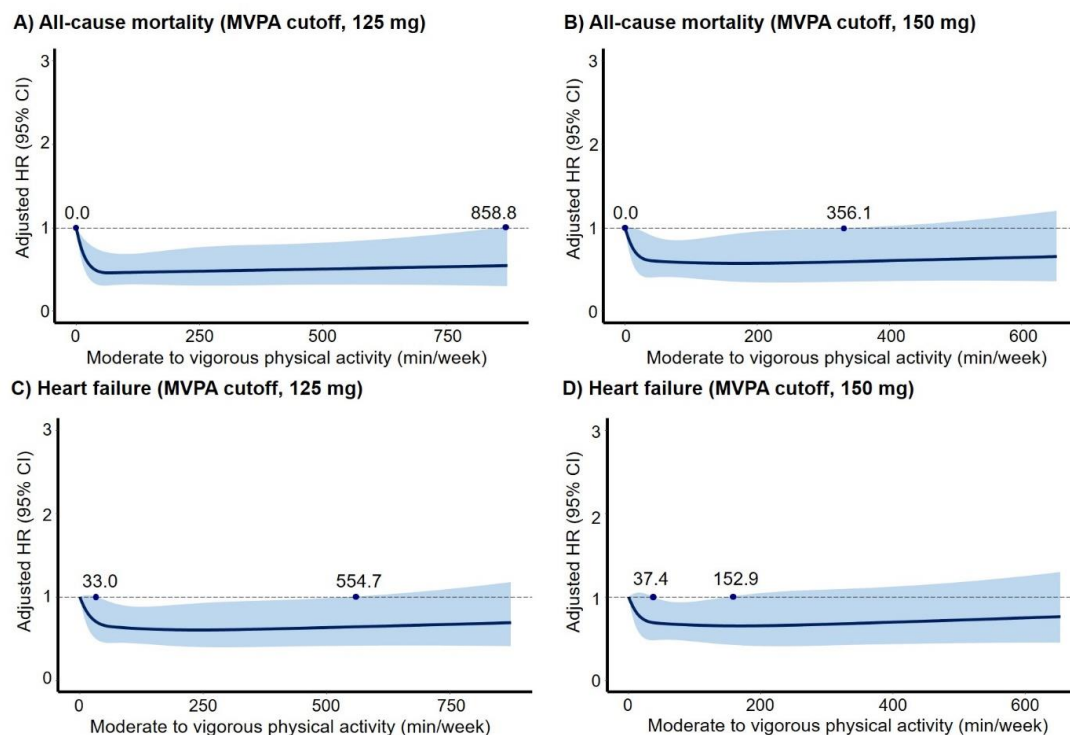

Abbreviation: HR, hazard ratio; CI, confidence interval

Hazard ratios were adjusted by age, sex, body mass index, current smoking, daily drinking, Charlson Comorbidity Index, and Townsend Deprivation Index.

**Supplementary Figure 3.** Cumulative risks of all-cause mortality and heart failure stratified by adherence to physical activity standard guidelines based on the objectively measured moderate to vigorous physical activity using a wrist-worn accelerometer applying the cutoff of 125mg and 150mg: A) all-cause mortality (MVPA cutoff, 125 mg); B) all-cause mortality (MVPA cutoff, 150 mg); C) heart failure (MVPA cutoff, 125 mg), and; D) heart failure (MVPA cutoff, 150 mg).

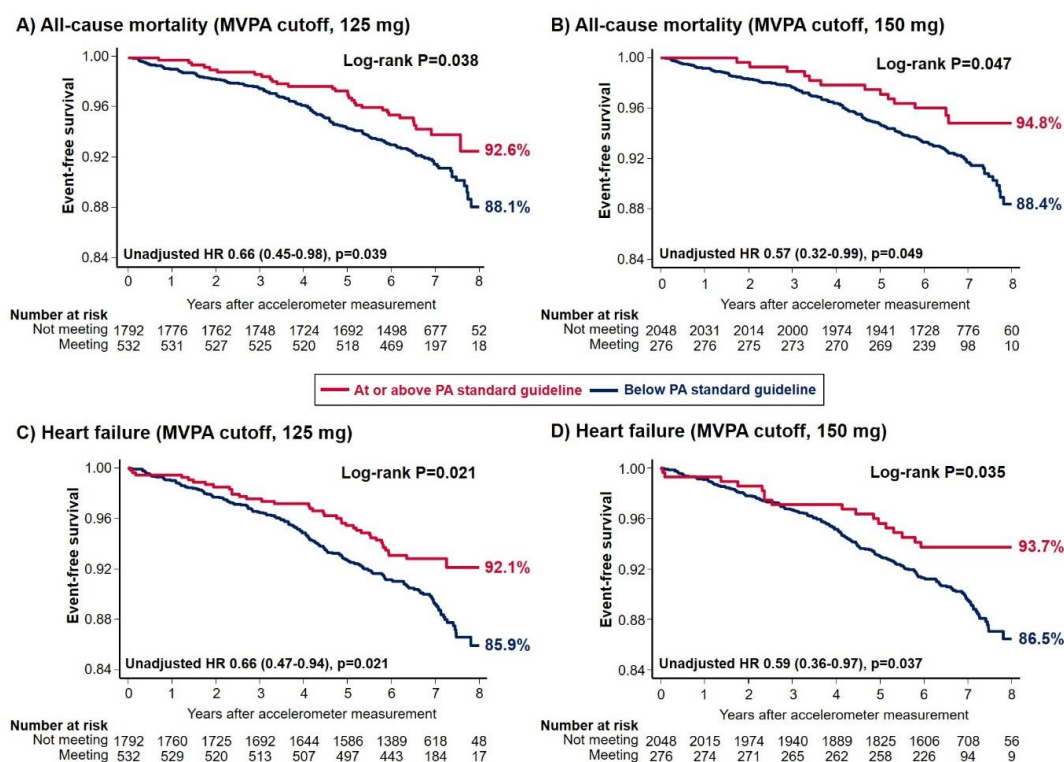

Abbreviation: HR, hazard ratio; MVPA, moderate to vigorous physical activity; PA, physical activity.
